# Supplementary material for: Behaviour of one-step spray-coated carbon nanotube supercapacitor in ambient light harvester circuit with printed organic solar cell and electrochromic display
Source: PubMed Central journal article supplement (PMC4783710; doi:10.1038/srep22967), 2016-03-09
Supplement: srep22967-s1.pdf [file srep22967-s1.pdf]

## Supplementary Information

Behaviour of one-step spray-coated carbon nanotube supercapacitor in ambient light harvester circuit with printed organic solar cell and electrochromic display

*Sampo Tuukkanen<sup>1,\*</sup>, Marja Välimäki<sup>2</sup>, Suvi Lehtimäki<sup>3</sup>, Tiina Vuorinen<sup>3</sup> and Donald Lupo<sup>3</sup>*

<sup>1</sup> Tampere University of Technology, Department of Automation Science and Engineering, P.O. Box 692, FI-33101 Tampere, Finland

<sup>2</sup> VTT Technical Research Centre of Finland, P. O. Box 1100, FI-90570 Oulu, Finland

<sup>3</sup> Tampere University of Technology, Department of Electronics and Communications Engineering, P.O. Box 692, FI-33101 Tampere, Finland

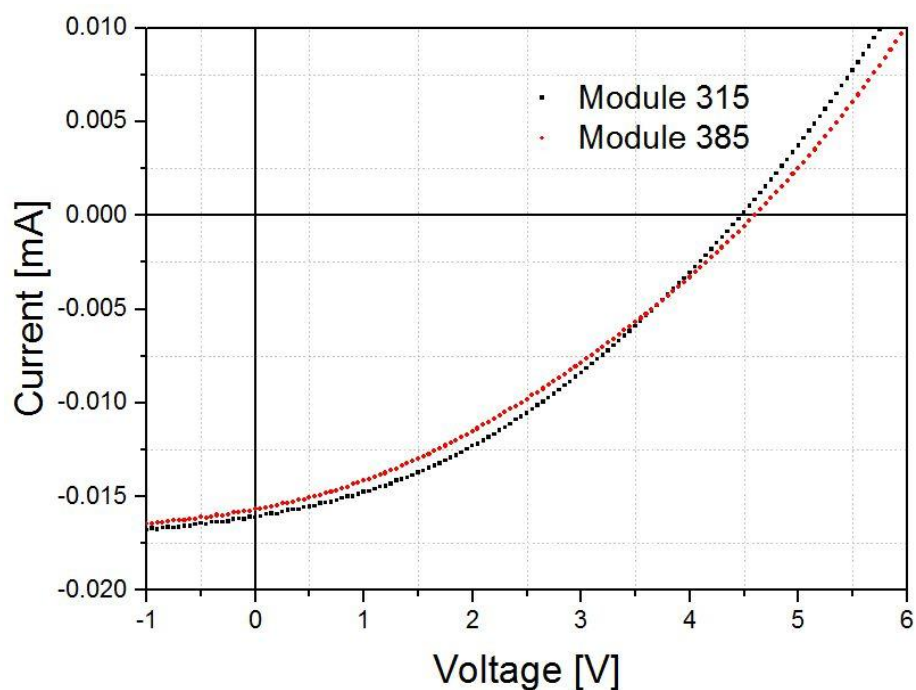

**Figure S1.** The current-voltage characteristics of two OPV modules used in this work. OPV module fabrication and characterization details are reported in [1].

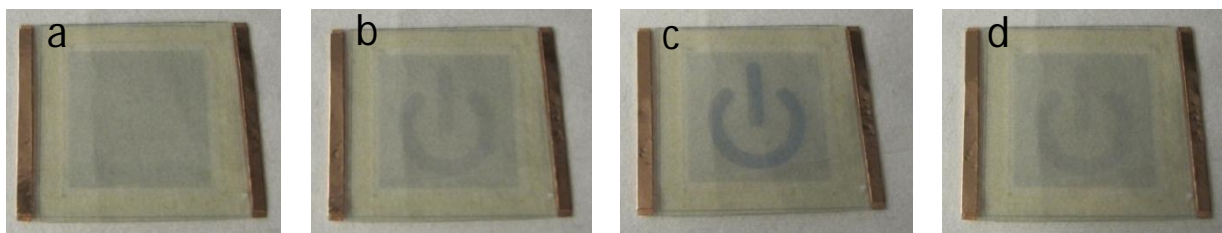

**Figure S2.** Electrochromic display (ECD) switching behavior and stability. External voltage supply was for switching here. a) Display before the experiment (in OFF state). b) Display switched ON using 0.5 V potential. c) Display switched ON using 1 V potential. d) Display after 5 minutes waiting from switching at 1V. The ECD was obtained from Ynvisible.

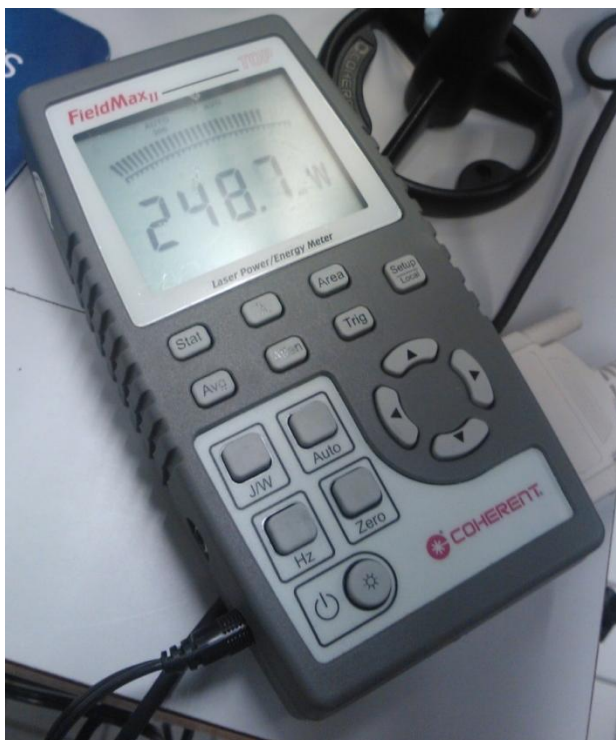

**Figure S3.** Photograph of the LUX-meter used for illuminance measurement in this work.

### Supplementary information references

- [1] Apilo, P., Hiltunen, J., Välimäki, M., Heinilehto, S., Sliz, R., & Hast, J. (2014). Roll-to-roll gravure printing of organic photovoltaic modules—insulation of processing defects by an interfacial layer. *Progress in Photovoltaics: Research and Applications*.
